# Supplementary material for: Inter-familial relationships of the shorebirds (Aves: Charadriiformes) based on nuclear DNA sequence data
Source: Springer Nature journal article supplement (doi:10.1186/1471-2148-3-16), 2003-07-23
Supplement: Additional file 1 [file 1471-2148-3-16-s1.pdf]

**Table 2.** Uncorrected, pairwise sequence distances (p-distances) of RAG-1 are given below the diagonal, and of myoglobin intron II above the diagonal.

|                      | <i>Larus</i> | <i>Sterna</i> | <i>Rynchops</i> | <i>Catharacta</i> | <i>Stercorarius</i> | <i>Alca</i> | <i>Cursorius</i> | <i>Rhinoptilus</i> | <i>Arenaria</i> | <i>Calidris</i> | <i>Phalaropus</i> | <i>Tringa</i> | <i>Gallinago</i> | <i>Jacana</i> | <i>Rostratula</i> | <i>Thinocorus</i> | <i>Charadrius</i> | <i>Pluvialis</i> | <i>Vanellus</i> | <i>Haematopus</i> | <i>Recurvirostra</i> | <i>Burhinus</i> | <i>Chionis</i> | <i>Afrotis</i> | <i>Grus</i> | <i>Pterocles</i> | <i>Scardafella</i> | <i>Alectura</i> | <i>Chauna</i> |
|----------------------|--------------|---------------|-----------------|-------------------|---------------------|-------------|------------------|--------------------|-----------------|-----------------|-------------------|---------------|------------------|---------------|-------------------|-------------------|-------------------|------------------|-----------------|-------------------|----------------------|-----------------|----------------|----------------|-------------|------------------|--------------------|-----------------|---------------|
| <i>Larus</i>         |              | 3.03          | 3.46            | 3.17              | 3.04                | 3.76        | 5.34             | 4.08               | 6.07            | 5.95            | 6.07              | 5.20          | 6.00             | 8.30          | 7.31              | 8.23              | 5.28              | 5.22             | 5.92            | 5.34              | 6.07                 | 5.19            | 6.24           | 7.83           | 6.78        | 10.40            | 11.93              | 14.57           | 10.80         |
| <i>Sterna</i>        | 1.19         |               | 3.32            | 3.47              | 3.19                | 3.33        | 5.20             | 4.38               | 5.93            | 5.81            | 5.93              | 5.35          | 6.30             | 9.04          | 7.32              | 7.95              | 4.85              | 5.23             | 5.64            | 5.06              | 5.79                 | 4.91            | 7.12           | 7.84           | 7.37        | 10.42            | 12.09              | 14.59           | 10.67         |
| <i>Rynchops</i>      | 1.62         | 1.72          |                 | 3.31              | 3.03                | 3.76        | 5.19             | 4.37               | 6.06            | 5.94            | 5.48              | 4.91          | 6.29             | 8.43          | 7.15              | 8.36              | 5.12              | 5.22             | 5.77            | 5.04              | 5.77                 | 4.90            | 7.10           | 8.10           | 7.06        | 10.39            | 11.91              | 14.09           | 10.93         |
| <i>Catharacta</i>    | 2.16         | 1.94          | 2.69            |                   |                     | 3.61        | 5.33             | 4.22               | 5.92            | 6.09            | 5.92              | 4.91          | 6.14             | 8.58          | 6.86              | 8.36              | 5.12              | 5.07             | 5.48            | 5.19              | 5.92                 | 5.04            | 6.96           | 7.53           | 7.06        | 9.94             | 11.32              | 14.55           | 11.22         |
| <i>Stercorarius</i>  | 2.05         | 1.83          | 2.58            | 0.11              |                     | 3.48        | 5.20             | 4.23               | 5.79            | 5.96            | 5.79              | 4.78          | 6.01             | 8.45          | 6.73              | 8.24              | 4.99              | 4.94             | 5.35            | 5.06              | 5.79                 | 4.91            | 6.98           | 7.40           | 6.94        | 9.82             | 11.21              | 14.29           | 10.96         |
| <i>Alca</i>          | 1.83         | 1.83          | 2.26            | 1.94              | 1.83                |             | 5.64             | 4.38               | 5.50            | 5.67            | 5.21              | 4.63          | 6.01             | 7.73          | 6.88              | 7.95              | 5.43              | 5.23             | 5.93            | 5.06              | 5.79                 | 5.20            | 7.12           | 7.40           | 7.23        | 9.97             | 11.95              | 14.13           | 10.38         |
| <i>Cursorius</i>     | 2.92         | 2.80          | 3.34            | 3.44              | 3.34                | 3.01        |                  | 4.30               | 7.81            | 7.78            | 7.68              | 6.96          | 7.77             | 10.30         | 8.80              | 10.07             | 6.77              | 6.85             | 7.53            | 6.67              | 7.24                 | 6.38            | 8.15           | 8.97           | 8.37        | 12.41            | 13.31              | 16.69           | 12.63         |
| <i>Rhinoptilus</i>   | 2.80         | 2.15          | 3.33            | 2.90              | 2.80                | 2.58        | 3.44             |                    | 6.74            | 6.99            | 6.61              | 6.03          | 6.83             | 9.68          | 7.69              | 8.88              | 6.40              | 5.90             | 6.74            | 5.87              | 6.74                 | 6.02            | 7.66           | 8.63           | 7.88        | 11.36            | 12.87              | 15.96           | 11.74         |
| <i>Arenaria</i>      | 3.88         | 3.76          | 4.09            | 3.76              | 3.66                | 3.55        | 4.84             | 4.19               |                 | 1.84            | 3.08              | 2.23          | 3.54             | 7.45          | 5.76              | 6.97              | 5.95              | 5.61             | 6.28            | 5.72              | 6.42                 | 5.44            | 7.59           | 7.84           | 7.53        | 10.33            | 12.66              | 15.23           | 11.28         |
| <i>Calidris</i>      | 5.29         | 5.16          | 5.48            | 5.16              | 5.05                | 4.95        | 5.92             | 5.59               | 2.47            |                 | 2.97              | 2.12          | 3.73             | 6.99          | 5.85              | 6.79              | 6.18              | 5.83             | 6.52            | 5.94              | 6.52                 | 5.66            | 7.68           | 7.95           | 7.36        | 9.61             | 12.84              | 14.86           | 11.44         |
| <i>Phalaropus</i>    | 3.89         | 3.77          | 4.09            | 3.77              | 3.66                | 3.77        | 4.64             | 4.63               | 2.05            | 3.02            |                   | 1.68          | 3.12             | 7.04          | 5.63              | 6.84              | 5.96              | 5.62             | 6.15            | 5.17              | 5.87                 | 5.73            | 7.46           | 7.57           | 6.98        | 9.91             | 12.82              | 14.08           | 10.59         |
| <i>Tringa</i>        | 3.99         | 3.87          | 4.19            | 4.09              | 3.98                | 3.66        | 4.74             | 4.30               | 1.72            | 3.12            | 2.16              |               | 2.69             | 6.47          | 5.19              | 6.42              | 5.24              | 4.77             | 5.45            | 4.46              | 5.31                 | 4.88            | 6.89           | 7.00           | 6.42        | 9.18             | 12.52              | 13.91           | 10.58         |
| <i>Gallinago</i>     | 4.01         | 3.89          | 4.00            | 4.64              | 4.54                | 4.10        | 4.97             | 4.97               | 2.48            | 3.67            | 2.60              | 3.02          |                  | 6.98          | 5.68              | 6.92              | 6.03              | 5.40             | 6.22            | 5.37              | 6.08                 | 5.79            | 7.27           | 7.37           | 7.77        | 10.32            | 13.26              | 14.69           | 11.43         |
| <i>Jacana</i>        | 3.88         | 3.76          | 4.30            | 4.41              | 4.30                | 3.98        | 4.63             | 4.84               | 3.66            | 5.05            | 3.66              | 3.98          | 3.89             |               | 6.53              | 7.87              | 8.40              | 7.77             | 8.30            | 7.72              | 8.44                 | 7.87            | 9.63           | 9.45           | 9.97        | 12.86            | 13.75              | 16.74           | 13.17         |
| <i>Rostratula</i>    | 3.78         | 3.56          | 4.09            | 4.09              | 3.99                | 3.77        | 4.42             | 4.31               | 3.88            | 4.96            | 3.89              | 3.88          | 4.11             | 2.69          |                   | 6.33              | 7.02              | 6.51             | 7.06            | 6.04              | 7.06                 | 6.47            | 8.41           | 9.10           | 8.63        | 11.41            | 12.63              | 15.79           | 11.94         |
| <i>Thinocorus</i>    | 4.85         | 4.73          | 5.27            | 5.38              | 5.27                | 4.84        | 5.60             | 5.59               | 4.41            | 5.16            | 4.31              | 4.52          | 4.54             | 3.76          | 3.99              |                   | 8.20              | 7.14             | 8.23            | 7.52              | 7.95                 | 7.66            | 9.27           | 9.65           | 10.17       | 13.04            | 14.63              | 17.11           | 13.66         |
| <i>Charadrius</i>    | 3.02         | 2.80          | 3.44            | 3.33              | 3.23                | 3.23        | 3.77             | 3.44               | 3.76            | 5.16            | 4.20              | 3.55          | 4.10             | 4.41          | 4.31              | 5.59              |                   | 3.84             | 2.69            | 3.25              | 3.82                 | 4.10            | 6.55           | 6.81           | 6.64        | 10.47            | 11.24              | 13.04           | 9.70          |
| <i>Pluvialis</i>     | 2.92         | 2.91          | 3.34            | 3.66              | 3.56                | 3.23        | 3.88             | 3.77               | 4.53            | 5.93            | 4.64              | 4.63          | 4.55             | 4.63          | 4.54              | 5.71              | 2.48              |                  | 4.06            | 3.36              | 4.20                 | 3.92            | 6.06           | 6.46           | 6.57        | 9.64             | 10.98              | 13.22           | 9.48          |
| <i>Vanellus</i>      | 2.49         | 2.26          | 2.91            | 3.34              | 3.23                | 2.69        | 3.45             | 3.23               | 3.88            | 5.28            | 3.78              | 3.88          | 3.90             | 4.09          | 4.00              | 5.06              | 1.83              | 1.73             |                 | 3.20              | 3.49                 | 4.32            | 6.46           | 6.85           | 7.24        | 10.46            | 11.36              | 13.74           | 10.28         |
| <i>Haematopus</i>    | 2.80         | 2.69          | 3.12            | 3.12              | 3.01                | 2.90        | 3.55             | 3.33               | 3.98            | 4.95            | 3.99              | 4.09          | 4.32             | 4.30          | 4.20              | 5.27              | 1.83              | 1.94             | 1.40            |                   | 1.95                 | 3.76            | 6.03           | 6.56           | 6.40        | 9.73             | 11.63              | 12.85           | 9.56          |
| <i>Recurvirostra</i> | 2.05         | 1.83          | 2.47            | 2.8               | 2.69                | 2.47        | 3.12             | 2.69               | 3.55            | 4.95            | 3.77              | 3.66          | 3.78             | 3.87          | 3.56              | 4.84              | 1.40              | 1.51             | 0.97            | 0.86              |                      | 4.60            | 6.74           | 7.13           | 6.96        | 10.89            | 12.07              | 13.45           | 10.28         |
| <i>Burhinus</i>      | 2.91         | 2.69          | 3.33            | 3.44              | 3.33                | 3.33        | 3.77             | 3.76               | 4.62            | 5.81            | 4.42              | 4.52          | 4.64             | 4.41          | 3.99              | 5.48              | 3.12              | 3.02             | 2.59            | 2.58              | 2.15                 |                 | 5.05           | 6.56           | 6.12        | 9.87             | 11.21              | 13.14           | 9.99          |
| <i>Chionis</i>       | 4.21         | 3.87          | 4.62            | 4.52              | 4.41                | 4.73        | 5.38             | 5.05               | 5.70            | 6.88            | 5.71              | 5.81          | 5.83             | 5.91          | 5.71              | 7.10              | 4.41              | 4.42             | 4.09            | 3.98              | 3.55                 | 3.76            |                | 8.31           | 7.99        | 11.83            | 13.59              | 15.61           | 11.77         |
| <i>Afrotis</i>       | 3.03         | 2.81          | 3.35            | 3.56              | 3.46                | 3.24        | 4.32             | 3.89               | 4.64            | 5.51            | 4.44              | 4.75          | 4.88             | 4.97          | 4.55              | 5.51              | 3.13              | 3.25             | 3.03            | 2.92              | 2.38                 | 3.67            | 4.97           |                | 8.52        | 10.49            | 12.96              | 15.40           | 9.89          |
| <i>Grus</i>          | 4.10         | 3.98          | 4.41            | 4.52              | 4.41                | 4.41        | 4.84             | 4.62               | 5.70            | 6.45            | 5.28              | 5.81          | 5.83             | 5.38          | 5.39              | 6.56              | 3.98              | 4.20             | 3.88            | 3.55              | 3.44                 | 4.3             | 5.59           | 3.56           |             | 10.16            | 12.91              | 14.01           | 10.69         |
| <i>Pterocles</i>     | 4.85         | 4.84          | 5.27            | 5.16              | 5.05                | 5.05        | 5.92             | 5.48               | 5.27            | 6.34            | 5.17              | 5.16          | 5.51             | 6.34          | 6.03              | 6.88              | 4.95              | 5.06             | 4.63            | 4.41              | 4.09                 | 5.27            | 6.13           | 4.10           | 5.81        |                  | 13.83              | 16.77           | 12.59         |
| <i>Scardafella</i>   | 4.23         | 4.11          | 4.32            | 5.08              | 4.97                | 4.65        | 5.09             | 4.97               | 5.41            | 7.14            | 5.96              | 5.62          | 5.54             | 6.05          | 5.96              | 6.81              | 4.43              | 4.44             | 4.01            | 4.00              | 3.57                 | 4.54            | 5.95           | 4.56           | 5.41        | 5.30             |                    | 17.38           | 14.73         |
| <i>Alectura</i>      | 7.98         | 7.74          | 8.39            | 8.17              | 8.06                | 7.74        | 8.50             | 8.49               | 8.71            | 9.25            | 8.51              | 8.49          | 9.40             | 8.71          | 8.62              | 9.68              | 7.63              | 8.30             | 7.87            | 7.31              | 7.31                 | 8.06            | 9.03           | 7.45           | 8.39        | 8.82             | 8.54               |                 | 11.48         |
| <i>Chauna</i>        | 6.16         | 6.14          | 6.14            | 6.67              | 6.57                | 6.46        | 7.22             | 7.10               | 7.54            | 8.72            | 7.12              | 7.00          | 7.89             | 7.54          | 7.55              | 8.61              | 6.24              | 6.47             | 5.93            | 6.03              | 5.49                 | 6.35            | 8.29           | 5.73           | 6.89        | 7.86             | 7.14               | 7.54            |               |
